# Supplementary material
Source: PubMed Central journal article supplement (PMC3683087)
Supplement: NIHMS440403-supplement-supplement_1.pdf [file NIHMS440403-supplement-supplement_1.pdf]

Table 2-online: **Criteria and Management of Feeding Intolerance.**

| <b>Signs of feeding intolerance</b>                                                                                                   |                                             | <b>Management***</b>                                                                                                                |
|---------------------------------------------------------------------------------------------------------------------------------------|---------------------------------------------|-------------------------------------------------------------------------------------------------------------------------------------|
| Gastric aspirate prior to the feeding                                                                                                 | <b>Other signs of feeding intolerance**</b> |                                                                                                                                     |
| <b>1a*)</b> if both $\leq 2$ ml <b>and</b> $\leq 1/3$ of previous feed volume                                                         | None                                        | Refeed aspirate as part of total volume, continue feeding                                                                           |
| <b>1b*)</b> if $\leq 2$ ml <b>but</b> $> 1/3$ of previous feed volume<br>or<br>if $> 2$ ml <b>but</b> $< 1/3$ of previous feed volume | None                                        | Check infant, then may refeed aspirate as part of total volume, and continue feeding.<br>Or may hold feeding and resume in 3 hours. |
| <b>2)</b> if $> 2$ ml and $> 1/3$ of previous feed volume                                                                             | None                                        | Stop feeding and recheck gastric aspirate in 3 hours.<br>Resume feeding when conditions revert to 1 above.                          |
| <b>3)</b> Irrespective                                                                                                                | Present                                     | Stop feeding, perform appropriate evaluation**** and resume when infant stable and conditions revert to (1) above.                  |

\* if continuous naso or orogastric feedings are used, check for residuals every 3 – 4 hours. Tolerate residuals of  $\leq 2$ ml or  $< 2$  hours worth of feeds (whichever is more.)

\*\* **Other signs** will include one or more of the following:

- a) blood stained gastric aspirate;
- b) vomiting  $\geq 1/3$  of the previous feed volume;
- c) abdominal distension, discoloration or tenderness;
- d) visible bowel loops
- e) bloody stool;
- f) KUB showing signs of intestinal dilatation;
- g) metabolic acidosis or new thrombocytopenia;
- h) Evidence that the child is not well: apnea (new onset or increasing frequency), respiratory distress, lethargy, poor perfusion, temperature instability, etc.

\*\*\* Recommendations: If residuals are bile stained or  $> 1/3$  feed volume, consider checking feeding tube placement, placing the infant prone or right side down; consider glycerin suppository if  $> 18$  hours since last stool; if recurrent episodes occur after a recent feeding advance, consider returning to the previously tolerated feeding volume

\*\*\*\* Evaluation of significant feeding intolerance to be performed by the primary clinical team according to the standard practice: (e.g., physical exam, X-ray, CBC, cultures, etc).

Table 4; online. Demographics of Ibuprofen, Indomethacin, and Total Populations: univariate analyses

| Demographic and Risk variables:                  | Ibuprofen Population |                  | Indomethacin Population |                 | Total Population   |                 |
|--------------------------------------------------|----------------------|------------------|-------------------------|-----------------|--------------------|-----------------|
|                                                  | Fasting (npo) n=24   | Feeding n=16     | Fasting (npo) n=72      | Feeding n=65    | Fasting (npo) n=96 | Feeding n=81    |
| Study drug-indomethacin, %                       | 0                    | 0                | 100                     | 100             | 75                 | 80              |
| Multiple birth, %                                | 38                   | 25               | 42                      | 20 <sup>a</sup> | 41                 | 21 <sup>a</sup> |
| Rupture of membranes >18h, %                     | 22                   | 19               | 17                      | 24              | 18                 | 23              |
| Preterm labor, %                                 | 75                   | 63               | 65                      | 78 <sup>b</sup> | 68                 | 75              |
| Maternal Diabetes, %                             | 8                    | 0                | 10                      | 8               | 9                  | 6               |
| Chorioamnionitis, %                              | 25                   | 13               | 10                      | 11              | 14                 | 11              |
| Preeclampsia, %                                  | 29                   | 38               | 18                      | 14              | 21                 | 19              |
| Betamethasone (>6hr), %                          | 83                   | 53 <sup>a</sup>  | 70                      | 71              | 74                 | 68              |
| Betamethasone (>24hr), %                         | 63                   | 40               | 55                      | 57              | 57                 | 54              |
| Antenatal antibiotics, %                         | 63                   | 50               | 46                      | 56              | 50                 | 55              |
| Birthweight-gm, mean (SD)                        | 875<br>(186)         | 818<br>(164)     | 872<br>(212)            | 867<br>(173)    | 873<br>(205)       | 857<br>(171)    |
| Birthweight categories:                          |                      |                  |                         |                 |                    |                 |
| ≤700 gm, %                                       | 17                   | 31               | 26                      | 17              | 24                 | 20              |
| 701-1000 gm, %                                   | 54                   | 50               | 42                      | 62              | 45                 | 59              |
| 1001-1250 gm, %                                  | 29                   | 19               | 32                      | 22              | 31                 | 21              |
| Gestation-wk, mean (SD)                          | 26.5<br>(1.9)        | 26.3<br>(1.8)    | 26.2<br>(2.1)           | 26.2<br>(1.8)   | 26.3<br>(2.0)      | 26.2<br>(1.8)   |
| SGA, %                                           | 13                   | 6                | 8                       | 3               | 9                  | 4               |
| 5 min Apgar <4, %                                | 8                    | 13               | 8                       | 12              | 8                  | 12              |
| Male sex, %                                      | 42                   | 25               | 42                      | 57 <sup>b</sup> | 42                 | 51              |
| Caucasian, %                                     | 63                   | 44               | 59                      | 48              | 60                 | 47 <sup>b</sup> |
| RDS, %                                           | 75                   | 100 <sup>a</sup> | 89                      | 92              | 85                 | 94 <sup>b</sup> |
| Surfactant, %                                    | 88                   | 100              | 85                      | 80              | 85                 | 84              |
| RSS at 24 hours-unit, mean (SD)                  | 1.8<br>(1.0)         | 2.6<br>(2.7)     | 1.9<br>(1.1)            | 1.9<br>(1.2)    | 1.9<br>(1.1)       | 2.0<br>(1.6)    |
| Vasopressors needed prior to enrollment, %       | 8                    | 0                | 6                       | 8               | 6                  | 6               |
| Prophylactic Indomethacin prior to enrollment, % | 4                    | 13               | 25                      | 26              | 20                 | 23              |
| Hydrocortisone prior to enrollment, %            | 4                    | 0                | 6                       | 6               | 5                  | 5               |
| UAC present at enrollment, %                     | 46                   | 56               | 42                      | 31              | 43                 | 36              |
| UVC present at enrollment, %                     | 50                   | 50               | 47                      | 28 <sup>a</sup> | 48                 | 32 <sup>a</sup> |
| RSS at enrollment, mean                          | 1.6                  | 1.9              | 2.1                     | 2.1             | 2.0                | 2.0             |

|                                                          |                |               |                |                             |                |                           |
|----------------------------------------------------------|----------------|---------------|----------------|-----------------------------|----------------|---------------------------|
| (SD)                                                     | (0.9)          | (1.3)         | (2.1)          | (2.1)                       | (1.9)          | (2.0)                     |
| Number of contiguous initial study drug courses          |                |               |                |                             |                |                           |
| 1-course, %                                              | 63             | 56            | 72             | 75                          | 70             | 72                        |
| 2-courses, %                                             | 29             | 38            | 25             | 25                          | 26             | 27                        |
| 3-courses, %                                             | 8              | 6             | 3              | 0                           | 4              | 1                         |
| PDA failed to close after initial drug treatment, %      | 54             | 75            | 59             | 58                          | 57             | 62                        |
| Additional study drug given during feeding advance, %    | 13             | 19            | 10             | 5                           | 10             | 7                         |
| Ligation during feeding advance, %                       | 29             | 31            | 14             | 19                          | 18             | 21                        |
| Ligation during hospitalization, %                       | 33             | 38            | 21             | 36 <sup>b</sup>             | 24             | 36 <sup>b</sup>           |
| Age at 1st feeding-days, mean (SD)                       | 4.7<br>(3.8)   | 3.8<br>(1.7)  | 4.9<br>(3.8)   | 3.5<br>(2.7) <sup>a</sup>   | 4.9<br>(3.8)   | 3.5<br>(2.6) <sup>a</sup> |
| Maximum enteral volume prior to study-ml/kg/d, mean (SD) | 11.4<br>(12.5) | 9.3<br>(11.3) | 12.6<br>(14.9) | 17.1<br>(16.7) <sup>b</sup> | 12.3<br>(14.3) | 15.6<br>(16.0)            |
| Age at study entry-days, mean (SD)                       | 5.3<br>(2.8)   | 5.5<br>(2.6)  | 6.7<br>(4.1)   | 6.9<br>(4.2)                | 6.4<br>(3.8)   | 6.6<br>(4.0)              |
| Milk type-breast milk, %                                 | 92             | 75            | 81             | 86                          | 83             | 84                        |

<sup>a</sup> = p<0.05

<sup>b</sup> = p<0.10

Table 6; online. Effect of “feeding” versus “fasting (*npo*)” on neonatal outcomes: univariate analyses

|                                                                                   | Ibuprofen Population        |                 | Indomethacin Population     |                         | Total Population            |                         |
|-----------------------------------------------------------------------------------|-----------------------------|-----------------|-----------------------------|-------------------------|-----------------------------|-------------------------|
|                                                                                   | Fasting ( <i>npo</i> ) n=24 | Feeding n=16    | Fasting ( <i>npo</i> ) n=72 | Feeding n=65            | Fasting ( <i>npo</i> ) n=96 | Feeding n=81            |
| <b>Feeding Related Outcomes:</b>                                                  |                             |                 |                             |                         |                             |                         |
| Age when taking 120 ml/k/d-days, mean (SD)                                        | 25.8 (10.1)                 | 24.7 (9.6)      | 23.4 (9.4)                  | 20.8 (8.3) <sup>b</sup> | 24.0 (9.6)                  | 21.6 (8.7) <sup>b</sup> |
| Actual Number of days to reach 120 ml/k/d, mean (SD)                              | 15.4 (8.1)                  | 13.4 (8.4)      | 12.3 (7.6)                  | 9.5 (5.9) <sup>a</sup>  | 13.1 (7.8)                  | 10.3 (6.6) <sup>a</sup> |
| Difference between Actual and Ideal number of days to reach 120 ml/k/d, mean (SD) | 7.5 (7.4)                   | 4.9 (8.7)       | 4.7 (6.9)                   | 2.5 (5.5) <sup>a</sup>  | 5.5 (7.1)                   | 3.0 (6.3) <sup>a</sup>  |
| Feeding advance delayed by feeding intolerance or NEC, %                          | 46                          | 38              | 38                          | 21 <sup>a</sup>         | 40                          | 24 <sup>a</sup>         |
| Feeding advance delayed by “other” causes, %                                      | 54                          | 56              | 41                          | 59 <sup>a</sup>         | 44                          | 59 <sup>b</sup>         |
| NEC/perforation prior to reaching 120 ml/k/d, %                                   | 4                           | 6               | 4                           | 0 <sup>b</sup>          | 4                           | 1                       |
| NEC/perforation ANY TIME during hospitalization, %                                | 8                           | 25              | 14                          | 6                       | 13                          | 10                      |
| Age when central venous line removed-days, mean (SD)                              | 30.1 (13)                   | 26.2 (18)       | 30 (32)                     | 27 (21)                 | 30 (28)                     | 27 (21)                 |
| infection during feeding advance, %                                               | 42                          | 13 <sup>a</sup> | 31                          | 29                      | 34                          | 26                      |
| infection any time during hospitalization, %                                      | 54                          | 31              | 42                          | 48                      | 45                          | 44                      |
| <b>Other Morbidities:</b>                                                         |                             |                 |                             |                         |                             |                         |
| ICH gr III or IV, %                                                               | 8                           | 6               | 7                           | 5                       | 7                           | 5                       |
| PVL or hydrocephalus, %                                                           | 13                          | 6               | 6                           | 6                       | 7                           | 6                       |
| BPD, %                                                                            | 43                          | 50              | 33                          | 57 <sup>a</sup>         | 36                          | 56 <sup>a</sup>         |
| ROP-treated, %                                                                    | 9                           | 13              | 3                           | 11 <sup>b</sup>         | 4                           | 12 <sup>b</sup>         |
| Death, %                                                                          | 4                           | 6               | 8                           | 5                       | 7                           | 5                       |
| Death or BPD, %                                                                   | 43                          | 50              | 38                          | 59 <sup>a</sup>         | 39                          | 58 <sup>a</sup>         |
| Death, NEC or BPD,                                                                | 52                          | 63              | 40                          | 61 <sup>a</sup>         | 43                          | 61 <sup>a</sup>         |

|   |  |  |  |  |  |  |
|---|--|--|--|--|--|--|
| % |  |  |  |  |  |  |
|---|--|--|--|--|--|--|

<sup>a</sup> = p<0.05

<sup>b</sup> = p<0.10

*Definitions:* Age, Postnatal age (day of birth = 0 days); *Necrotizing enterocolitis*, Bell's classification  $\geq$ II (treated medically or surgically) and "spontaneous perforations" occurring before 7 days of life; *Infection*, any culture positive infection (bacteremia, pneumonia, urinary tract infection, meningitis); *ICH*, intracranial hemorrhage  $\geq$  Grade III; *PVL*, cystic periventricular leukomalacia diagnosed by ultrasound; *BPD*, Bronchopulmonary Dysplasia: the need for supplemental oxygen to maintain oxygen saturation >90% at 36 weeks corrected age; *ROP*, stage 2 with plus disease or stage 3 treated with either laser or bevacizumab; *Feeding advance delayed by "other" causes*, percent of the population that had their feeding advance interrupted or delayed by one or more of the following causes: a) PDA ligation, b) sepsis workup, recurrent apneas, respiratory deterioration, c) hypotension requiring inotropes, or d) blood transfusions.
